# Supplementary material for: Limited Knowledge of Chronic Kidney Disease among Type 2 Diabetes Mellitus Patients in India
Source: Int J Environ Res Public Health. 2019 Apr 23;16(8):1443. doi: 10.3390/ijerph16081443 (PMC6518175; doi:10.3390/ijerph16081443)
Supplement: Supplementary file 1 [file ijerph-16-01443-s001.pdf]

## Supplementary File S1

### Questionnaire to assess the awareness of kidney disease:

1. How many healthy kidney(s) does a person need to lead a normal life?  
① One      ② Two      ③ I don't know
2. What is the function of a kidney in a human body?  
① To break down food  
② To produce substances that breakdown fat  
③ To filter waste products in the blood  
④ I don't know
3. What can cause kidney disease?  
① High blood pressure  
② Diabetes  
③ Inherited condition  
④ All of the above  
⑤ I don't know
4. What are the symptoms of early kidney disease that might progress to kidney failure?  
① Bubbles in the urine  
② Back pain  
③ Blood in the urine  
④ Can present without any symptoms/ complaints  
⑤ All of the above  
⑥ I don't know
5. Which of the following statement about kidney disease is INCORRECT:  
① Kidney disease can be prevented  
② Kidney disease can be cured with medications  
③ A person is said to have kidney disease when he/she needs dialysis  
④ None of the above  
⑤ I don't know
6. Where can dialysis treatment be carried out?  
① In a dialysis centre and at home  
② Only in a dialysis centre  
③ Only at home  
④ I don't know
7. What is the best medical treatment for End Stage Kidney Failure?  
① Medication  
② Dialysis  
③ Kidney transplant  
④ I don't know
